# Supplementary material for: Synthesis of self-stacked CuFe2O4–Fe2O3porous nanosheets as a high performance Li-ion battery anode
Source: Royal Society of Chemistry journal article supplement (doi:10.1039/c4ta03008g), 2014-01-01
Supplement: c4ta03008g1.pdf [file c4ta03008g1.pdf]

Electronic Supplementary Information for

## Synthesis of Self-Stacked $\text{CuFe}_2\text{O}_4\text{-Fe}_2\text{O}_3$ Porous Nanosheets as High Performance Li-Ion Battery Anode

Fei-Xiang Ma,<sup>a,b</sup> Pan-Pan Wang,<sup>a,b</sup> Cheng-Yan Xu,<sup>a,b,\*</sup> Jing Yu,<sup>a,b</sup> Hai-Tao Fang<sup>a</sup> and Liang Zhen<sup>a,b,\*</sup>

<sup>a</sup> School of Materials Science and Engineering, Harbin Institute of Technology, Harbin 150001, China.

<sup>b</sup> MOE Key Laboratory of Micro-system and Micro-structures Manufacturing, Harbin Institute of Technology, Harbin 150080, China

Fax: 86 451 8641 3922; Tel: 86 451 8641 2133; E-mail: cy\_xu@hit.edu.cn; lzhen@hit.edu.cn.

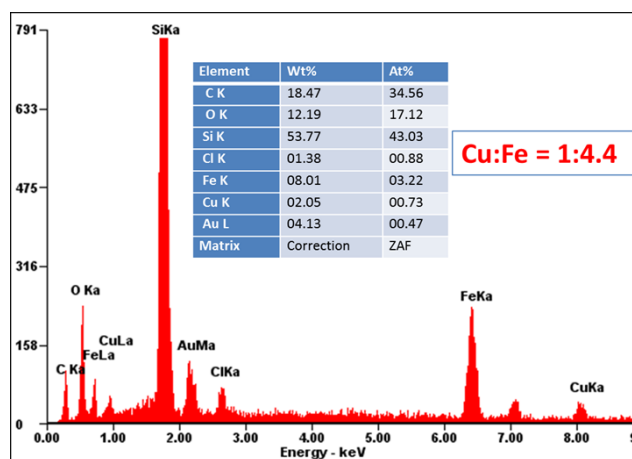

Fig. S1 EDS of as-prepared CuFe-glycolate precursor.

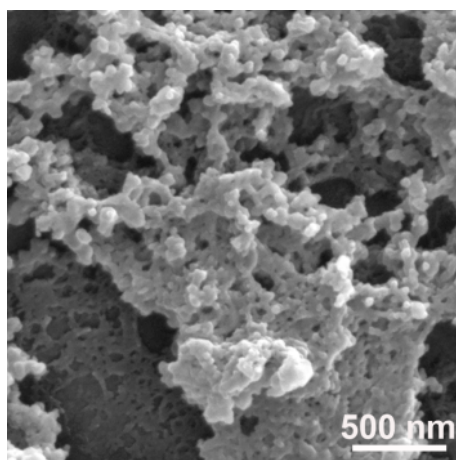

Fig. S2 SEM image of as-prepared Fe-glycolate precursor nanoparticles.

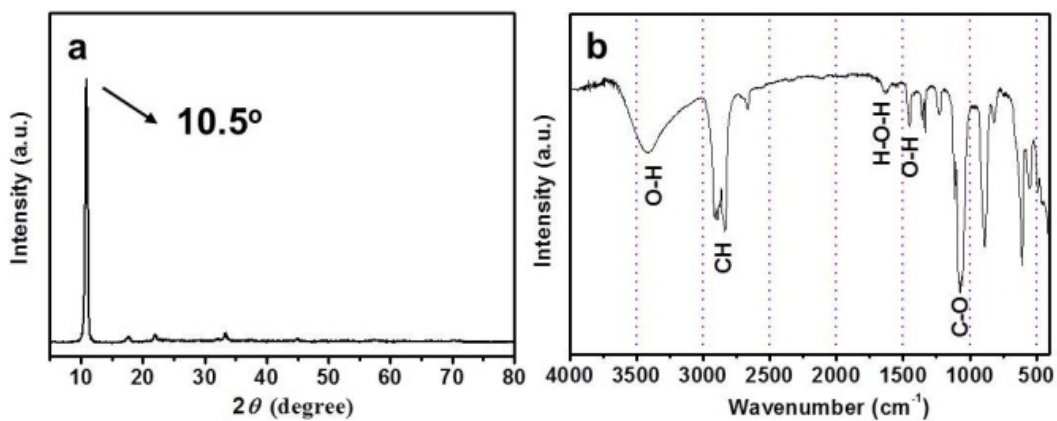

Fig. S3 XRD pattern and FTIR spectra of the as-prepared CuFe-glycolate precursor.

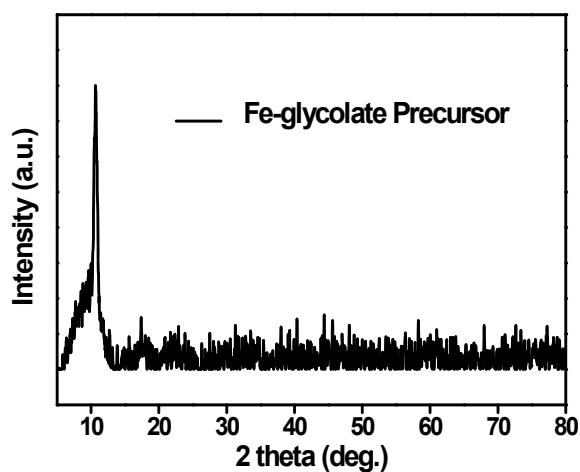

Fig. S4 XRD pattern of as-prepared Fe-glycolate precursor nanoparticles.

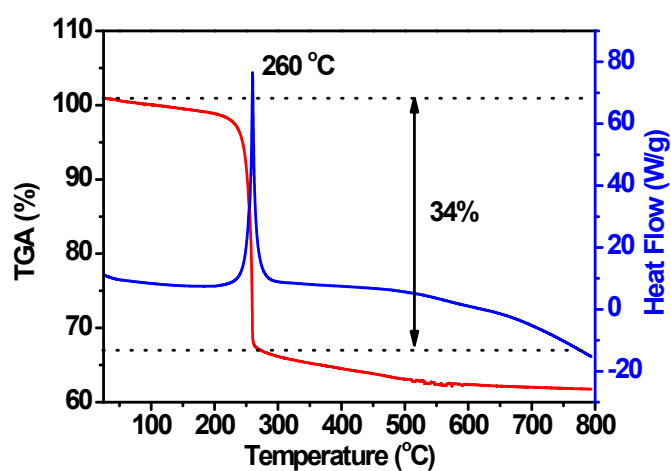

Fig. S5 TGA curve of CuFe-glycolate precursor recorded in air atmosphere.

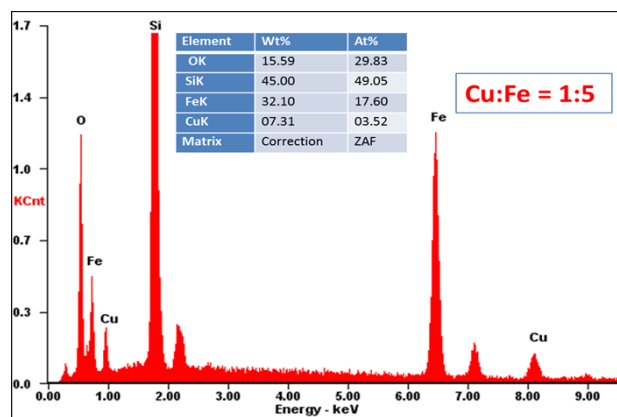

**Fig. S6** EDS of the as-synthesized  $\text{CuFe}_2\text{O}_4\text{-Fe}_2\text{O}_3$  nanosheets after annealing at 350 °C for 3 h in air.

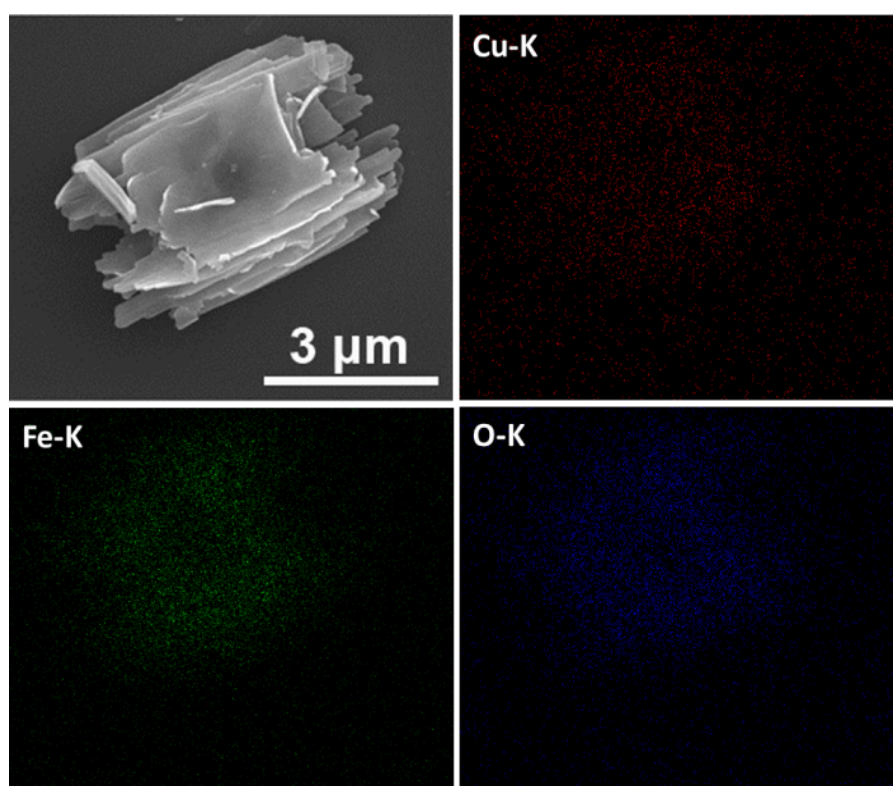

**Fig. S7** Element mapping images of Cu, Fe and O of a single self-stacked  $\text{CuFe}_2\text{O}_4\text{-Fe}_2\text{O}_3$  nanosheets.

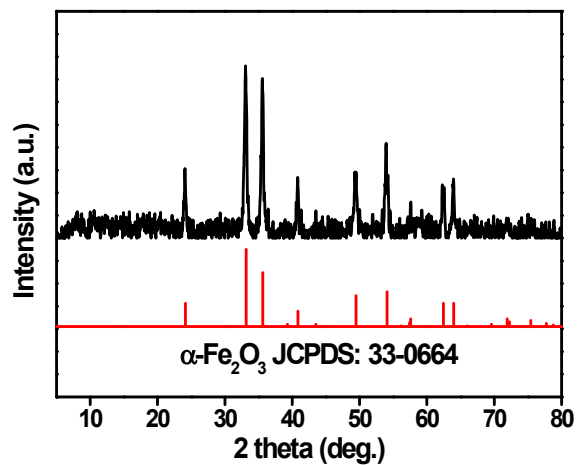

Fig. S8 XRD pattern of the thermal annealing Fe-glycolate precursor.

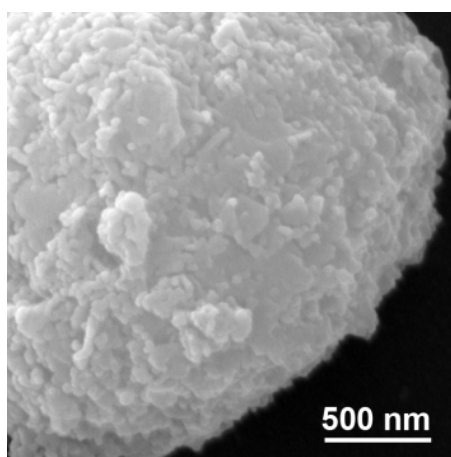

Fig. S9 SEM image of the  $\text{Fe}_2\text{O}_3$  nanoparticles after heat treatment.

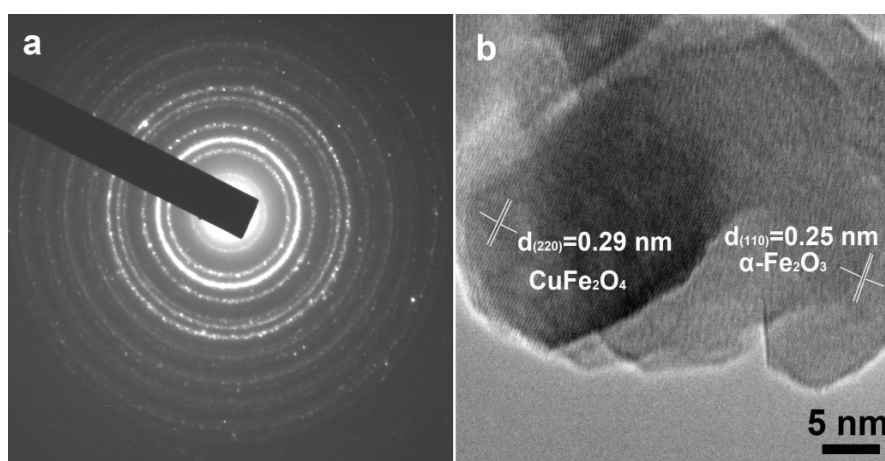

Fig. S10 SAED pattern (a) and HRTEM image (b) of the as-synthesized  $\text{CuFe}_2\text{O}_4\text{-Fe}_2\text{O}_3$  nanosheets after thermal annealing at  $350^\circ\text{C}$  for 3 h in air.

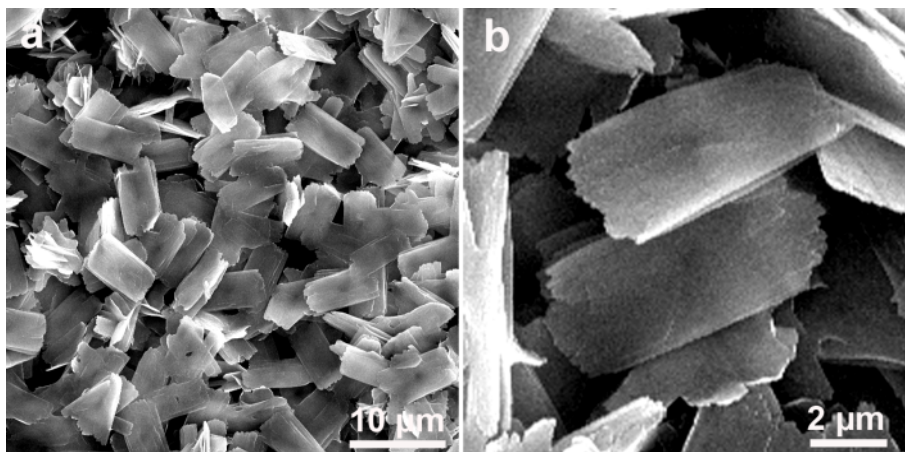

**Fig. S11** SEM images of as-prepared CuFe-glycolate precursor nanosheets with a short reaction time of 30 min.

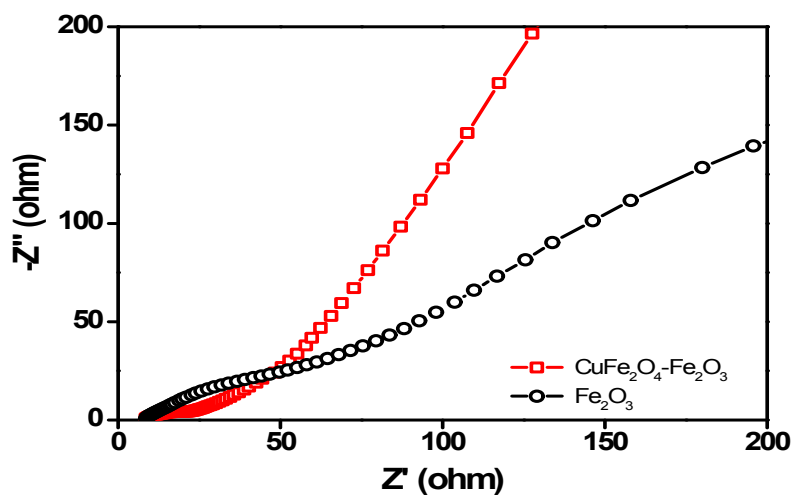

**Fig. S12** Nyquist plots of self-stacked CuFe<sub>2</sub>O<sub>4</sub>-Fe<sub>2</sub>O<sub>3</sub> nanosheets and Fe<sub>2</sub>O<sub>3</sub> nanosheets electrodes after 100 discharge/charge cycles.
